# Supplementary material for: Understanding non-ideal voltage behaviour of cathodes for lithium-ion batteries
Source: Royal Society of Chemistry journal article supplement (doi:10.1039/c4ta04341c), 2014-09-30
Supplement: c4ta04341c1.pdf [file c4ta04341c1.pdf]

### SUPPLEMENTARY INFORMATION

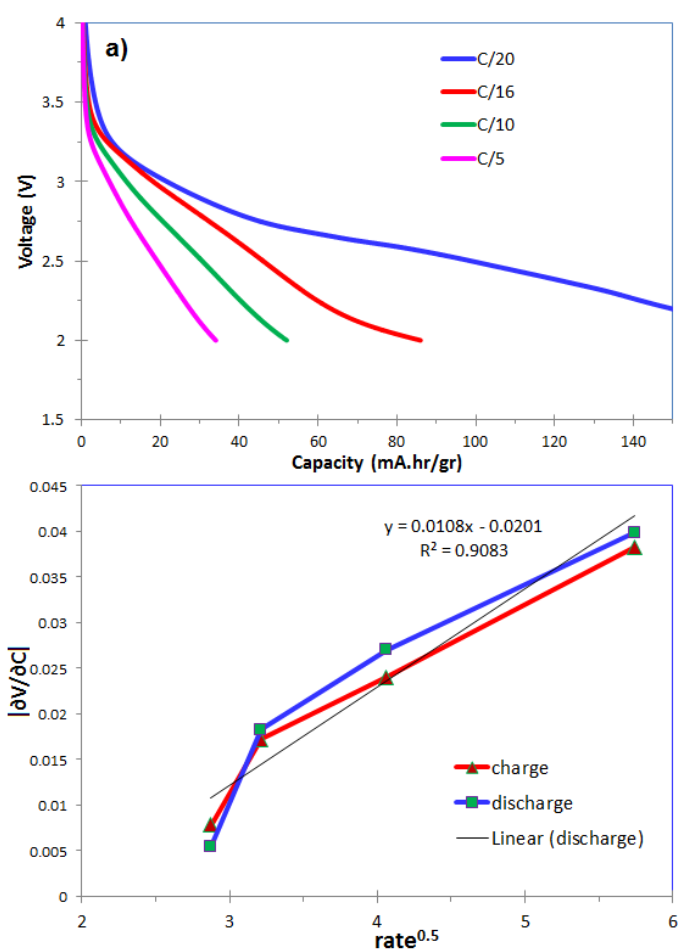

**Figure 1S.** a) V-C diagrams of discharge measurements of our sample with different rates, b) absolute value of slope of charge/discharge diagrams ( $|\partial V/\partial C|$ ) versus square root of the applied rates.
